# Supplementary material for: Long term impacts of endozoochory and salinity on germination of wetland plants after entering simulated seed banks
Source: Front Plant Sci. 2023 Oct 31;14:1275622. doi: 10.3389/fpls.2023.1275622 (PMC10644059; doi:10.3389/fpls.2023.1275622)
Supplement: Supplementary file 1 [file Table_1.xlsx]

## Sheet: G_T50% 30,180,365
Passage	SPP	Time	Sal	Replicate	G	T50
0	1	30	1	1	84	3
0	1	30	1	2	80	3
0	1	30	1	3	88	3
0	1	30	1	4	68	3
0	1	30	2	1	80	3
0	1	30	2	2	60	3
0	1	30	2	3	76	3
0	1	30	2	4	92	3
0	1	30	4	1	88	3
0	1	30	4	2	92	3
0	1	30	4	3	88	3
0	1	30	4	4	96	3
0	1	30	8	1	92	3
0	1	30	8	2	80	3
0	1	30	8	3	92	3
0	1	30	8	4	68	3
0	1	30	16	1	100	3
0	1	30	16	2	44	3
0	1	30	16	3	92	3
0	1	30	16	4	92	3
0	1	30	32	1	100	3
0	1	30	32	2	80	3
0	1	30	32	3	92	3
0	1	30	32	4	92	3
0	1	180	1	1	56	3
0	1	180	1	2	52	3
0	1	180	1	3	80	3
0	1	180	1	4	56	6
0	1	180	2	1	68	3
0	1	180	2	2	60	3
0	1	180	2	3	48	3
0	1	180	2	4	68	3
0	1	180	4	1	56	3
0	1	180	4	2	60	3
0	1	180	4	3	68	3
0	1	180	4	4	48	3
0	1	180	8	1	56	3
0	1	180	8	2	36	3
0	1	180	8	3	60	3
0	1	180	8	4	72	3
0	1	180	16	1	40	6
0	1	180	16	2	52	3
0	1	180	16	3	68	3
0	1	180	16	4	68	3
0	1	180	32	1	44	3
0	1	180	32	2	48	6
0	1	180	32	3	44	6
0	1	180	32	4	56	3
0	1	365	1	1	56	9
0	1	365	1	2	48	9
0	1	365	1	3	60	9
0	1	365	1	4	68	9
0	1	365	2	1	76	6
0	1	365	2	2	68	9
0	1	365	2	3	60	6
0	1	365	2	4	92	9
0	1	365	4	1	80	9
0	1	365	4	2	56	9
0	1	365	4	3	52	9
0	1	365	4	4	64	9
0	1	365	8	1	60	9
0	1	365	8	2	52	6
0	1	365	8	3	76	9
0	1	365	8	4	52	6
0	1	365	16	1	72	9
0	1	365	16	2	68	9
0	1	365	16	3	60	9
0	1	365	16	4	60	9
0	1	365	32	1	44	9
0	1	365	32	2	76	6
0	1	365	32	3	60	9
0	1	365	32	4	56	6
0	2	30	1	1	100	9
0	2	30	1	2	52	12
0	2	30	1	3	84	9
0	2	30	1	4	72	12
0	2	30	2	1	60	12
0	2	30	2	2	100	12
0	2	30	2	3	80	9
0	2	30	2	4	80	9
0	2	30	4	1	76	12
0	2	30	4	2	100	12
0	2	30	4	3	88	9
0	2	30	4	4	92	12
0	2	30	8	1	92	12
0	2	30	8	2	100	9
0	2	30	8	3	76	9
0	2	30	8	4	60	9
0	2	30	16	1	96	9
0	2	30	16	2	68	12
0	2	30	16	3	76	9
0	2	30	16	4	56	9
0	2	30	32	1	52	6
0	2	30	32	2	84	9
0	2	30	32	3	64	9
0	2	30	32	4	84	6
0	2	180	1	1	68	6
0	2	180	1	2	76	3
0	2	180	1	3	84	3
0	2	180	1	4	84	6
0	2	180	2	1	60	12
0	2	180	2	2	60	12
0	2	180	2	3	72	9
0	2	180	2	4	60	6
0	2	180	4	1	64	12
0	2	180	4	2	52	12
0	2	180	4	3	56	12
0	2	180	4	4	56	9
0	2	180	8	1	76	12
0	2	180	8	2	84	9
0	2	180	8	3	72	12
0	2	180	8	4	76	9
0	2	180	16	1	100	9
0	2	180	16	2	76	9
0	2	180	16	3	92	9
0	2	180	16	4	80	9
0	2	180	32	1	68	9
0	2	180	32	2	80	9
0	2	180	32	3	76	9
0	2	180	32	4	76	12
0	2	365	1	1	72	9
0	2	365	1	2	76	9
0	2	365	1	3	52	9
0	2	365	1	4	68	9
0	2	365	2	1	80	9
0	2	365	2	2	76	9
0	2	365	2	3	84	9
0	2	365	2	4	64	9
0	2	365	4	1	72	9
0	2	365	4	2	72	6
0	2	365	4	3	68	6
0	2	365	4	4	84	9
0	2	365	8	1	68	6
0	2	365	8	2	68	9
0	2	365	8	3	56	6
0	2	365	8	4	48	6
0	2	365	16	1	68	9
0	2	365	16	2	52	6
0	2	365	16	3	60	9
0	2	365	16	4	84	9
0	2	365	32	1	52	6
0	2	365	32	2	52	9
0	2	365	32	3	56	6
0	2	365	32	4	64	9
0	3	30	1	1	52	3
0	3	30	1	2	76	3
0	3	30	1	3	64	3
0	3	30	1	4	84	6
0	3	30	2	1	80	3
0	3	30	2	2	48	3
0	3	30	2	3	36	3
0	3	30	2	4	72	3
0	3	30	4	1	60	6
0	3	30	4	2	56	9
0	3	30	4	3	76	3
0	3	30	4	4	32	9
0	3	30	8	1	84	6
0	3	30	8	2	88	9
0	3	30	8	3	60	3
0	3	30	8	4	84	3
0	3	30	16	1	72	6
0	3	30	16	2	60	9
0	3	30	16	3	88	6
0	3	30	16	4	40	3
0	3	30	32	1	60	3
0	3	30	32	2	80	3
0	3	30	32	3	84	6
0	3	30	32	4	68	6
0	3	180	1	1	40	9
0	3	180	1	2	44	12
0	3	180	1	3	44	12
0	3	180	1	4	32	12
0	3	180	2	1	36	12
0	3	180	2	2	64	12
0	3	180	2	3	56	9
0	3	180	2	4	76	12
0	3	180	4	1	56	9
0	3	180	4	2	76	12
0	3	180	4	3	60	12
0	3	180	4	4	52	12
0	3	180	8	1	48	12
0	3	180	8	2	64	12
0	3	180	8	3	76	12
0	3	180	8	4	56	12
0	3	180	16	1	68	12
0	3	180	16	2	44	12
0	3	180	16	3	72	12
0	3	180	16	4	56	12
0	3	180	32	1	88	9
0	3	180	32	2	68	9
0	3	180	32	3	80	12
0	3	180	32	4	88	9
0	3	365	1	1	56	15
0	3	365	1	2	48	21
0	3	365	1	3	60	18
0	3	365	1	4	68	12
0	3	365	2	1	76	12
0	3	365	2	2	68	12
0	3	365	2	3	60	12
0	3	365	2	4	92	12
0	3	365	4	1	80	12
0	3	365	4	2	56	18
0	3	365	4	3	52	15
0	3	365	4	4	64	12
0	3	365	8	1	60	12
0	3	365	8	2	52	21
0	3	365	8	3	76	15
0	3	365	8	4	52	15
0	3	365	16	1	72	15
0	3	365	16	2	68	12
0	3	365	16	3	60	15
0	3	365	16	4	60	12
0	3	365	32	1	44	15
0	3	365	32	2	76	12
0	3	365	32	3	60	15
0	3	365	32	4	56	12
1	1	30	1	1	40	4
1	1	30	1	2	52	4
1	1	30	1	3	28	4
1	1	30	1	4	60	4
1	1	30	2	1	48	11
1	1	30	2	2	80	4
1	1	30	2	3	52	4
1	1	30	2	4	48	4
1	1	30	4	1	28	6
1	1	30	4	2	56	18
1	1	30	4	3	32	6
1	1	30	4	4	68	18
1	1	30	8	1	68	4
1	1	30	8	2	20	5
1	1	30	8	3	36	9
1	1	30	8	4	36	4
1	1	30	16	1	40	9
1	1	30	16	2	48	6
1	1	30	16	3	56	19
1	1	30	16	4	60	6
1	1	30	32	1	60	19
1	1	30	32	2	44	22
1	1	30	32	3	68	19
1	1	30	32	4	52	10
1	1	180	1	1	56	3
1	1	180	1	2	12	3
1	1	180	1	3	36	6
1	1	180	1	4	20	3
1	1	180	2	1	44	3
1	1	180	2	2	72	3
1	1	180	2	3	43.4783	3
1	1	180	2	4	32	4
1	1	180	4	1	60	11
1	1	180	4	2	52	3
1	1	180	4	3	32	3
1	1	180	4	4	28	3
1	1	180	8	1	28	3
1	1	180	8	2	28	3
1	1	180	8	3	40	3
1	1	180	8	4	52	3
1	1	180	16	1	44	3
1	1	180	16	2	44	3
1	1	180	16	3	44	3
1	1	180	16	4	88	20
1	1	180	32	1	48	7
1	1	180	32	2	50	4
1	1	180	32	3	24	3
1	1	180	32	4	28	3
1	1	365	1	1	36	3
1	1	365	1	2	44	3
1	1	365	1	3	40	3
1	1	365	1	4	24	3
1	1	365	2	1	16	3
1	1	365	2	2	20	3
1	1	365	2	3	36	3
1	1	365	2	4	36	3
1	1	365	4	1	52	3
1	1	365	4	2	28	3
1	1	365	4	3	28	3
1	1	365	4	4	16	3
1	1	365	8	1	28	3
1	1	365	8	2	24	3
1	1	365	8	3	40	3
1	1	365	8	4	56	3
1	1	365	16	1	24	3
1	1	365	16	2	20	3
1	1	365	16	3	36	3
1	1	365	16	4	24	3
1	1	365	32	1	36	3
1	1	365	32	2	0
1	1	365	32	3	40	3
1	1	365	32	4	28	3
1	2	30	1	1	64	10
1	2	30	1	2	80	13
1	2	30	1	3	72	12
1	2	30	1	4	84	13
1	2	30	2	1	52	11
1	2	30	2	2	84	10
1	2	30	2	3	52	14
1	2	30	2	4	60	15
1	2	30	4	1	56	13
1	2	30	4	2	56	9
1	2	30	4	3	76	11
1	2	30	4	4	68	10
1	2	30	8	1	80	18
1	2	30	8	2	68	8
1	2	30	8	3	84	11
1	2	30	8	4	68	14
1	2	30	16	1	56	12
1	2	30	16	2	48	9
1	2	30	16	3	60	10
1	2	30	16	4	52	9
1	2	30	32	1	64	12
1	2	30	32	2	84	11
1	2	30	32	3	88	10
1	2	30	32	4	80	14
1	2	180	1	1	72	10
1	2	180	1	2	80	9
1	2	180	1	3	80	9
1	2	180	1	4	68	9
1	2	180	2	1	80	9
1	2	180	2	2	68	9
1	2	180	2	3	84	12
1	2	180	2	4	60	9
1	2	180	4	1	76	8
1	2	180	4	2	100	9
1	2	180	4	3	88	10
1	2	180	4	4	64	8
1	2	180	8	1	60	9
1	2	180	8	2	48	8
1	2	180	8	3	64	9
1	2	180	8	4	60	9
1	2	180	16	1	76	9
1	2	180	16	2	64	8
1	2	180	16	3	72	8
1	2	180	16	4	76	9
1	2	180	32	1	84	21
1	2	180	32	2	80	18
1	2	180	32	3	84	19
1	2	180	32	4	100	22
1	2	365	1	1	76	21
1	2	365	1	2	56	18
1	2	365	1	3	88	21
1	2	365	1	4	72	18
1	2	365	2	1	60	9
1	2	365	2	2	80	9
1	2	365	2	3	84	9
1	2	365	2	4	88	9
1	2	365	4	1	56	3
1	2	365	4	2	72	3
1	2	365	4	3	68	3
1	2	365	4	4	64	3
1	2	365	8	1	60	3
1	2	365	8	2	68	3
1	2	365	8	3	60	9
1	2	365	8	4	64	9
1	2	365	16	1	72	12
1	2	365	16	2	76	9
1	2	365	16	3
1	2	365	16	4	84	3
1	2	365	32	1	72	18
1	2	365	32	2	60	18
1	2	365	32	3	64	18
1	2	365	32	4	64	18
1	3	30	1	1	28	9
1	3	30	1	2	28	9
1	3	30	1	3	28	9
1	3	30	1	4	40	6
1	3	30	2	1	40	7
1	3	30	2	2	44	6
1	3	30	2	3	40	8
1	3	30	2	4	44	9
1	3	30	4	1	52	11
1	3	30	4	2	28	9
1	3	30	4	3	28	7
1	3	30	4	4	40	18
1	3	30	8	1	52	9
1	3	30	8	2	40	8
1	3	30	8	3	44	8
1	3	30	8	4	48	8
1	3	30	16	1	56	8
1	3	30	16	2	56	12
1	3	30	16	3	52	8
1	3	30	16	4	44	9
1	3	30	32	1	52	9
1	3	30	32	2	20	9
1	3	30	32	3	36	8
1	3	30	32	4	28	8
1	3	180	1	1	64	8
1	3	180	1	2	60	8
1	3	180	1	3	40	11
1	3	180	1	4	52	6
1	3	180	2	1	64	10
1	3	180	2	2	72	9
1	3	180	2	3	48	9
1	3	180	2	4	73.913	9
1	3	180	4	1	48	8
1	3	180	4	2	68	9
1	3	180	4	3	64	9
1	3	180	4	4	48	10
1	3	180	8	1	60	9
1	3	180	8	2	40	8
1	3	180	8	3	52	7
1	3	180	8	4	32	12
1	3	180	16	1	66.6667	10
1	3	180	16	2	60	12
1	3	180	16	3	64	10
1	3	180	16	4	56	8
1	3	180	32	1	76	10
1	3	180	32	2	60	10
1	3	180	32	3	52	8
1	3	180	32	4	68	9
1	3	365	1	1	0
1	3	365	1	2	8	18
1	3	365	1	3	4	18
1	3	365	1	4	0
1	3	365	2	1	0
1	3	365	2	2	0
1	3	365	2	3	0
1	3	365	2	4	0
1	3	365	4	1	12	18
1	3	365	4	2	8	12
1	3	365	4	3	0
1	3	365	4	4	16	12
1	3	365	8	1	0
1	3	365	8	2	20	12
1	3	365	8	3	8	14
1	3	365	8	4	36	15
1	3	365	16	1	0
1	3	365	16	2	8	16
1	3	365	16	3	0
1	3	365	16	4	24	15
1	3	365	32	1	0
1	3	365	32	2	4	18
1	3	365	32	3	8	18
1	3	365	32	4	16	18

## Sheet: G_Control seeds not stored
Passage	Spp	Sal	Exposure Time	Replicate	Code	Day 0	Day 3	Day 6	Day 9	Day 14	Day 15	Day 18	Day 21	Day 24	Day 27	Day 30
1	1	0	0	1	Js-0.1	0	0	20	52	60	72	80	76	80	80	80
1	1	0	0	2	Js-0. 2	0	4	12	20	32	44	52	64	72	72	72
1	1	0	0	3	Js-0. 3	0	8	28	36	48	48	52	60	60	60	60
1	1	0	0	4	Js-0. 4	0	12	32	48	60	64	72	64	68	68	68
1	3	0	0	1	Sm-0. 1	0	0	0	0	0	12	32	36	40	56	68
1	3	0	0	2	Sm-0. 2	0	0	0	4	8	12	32	48	60	64	64
1	3	0	0	3	Sm-0. 3	0	0	0	0	4	4	24	24	28	32	36
1	3	0	0	4	Sm-0. 4	0	0	0	0	0	0	8	8	32	36	40
1	2	0	0	1	Sl-0. 1	0	0	0	20	36	40	44	44	44	44	44
1	2	0	0	2	Sl-0. 2	0	0	0	4	8	8	12	16	20	20	20
1	2	0	0	3	Sl-0. 3	0	0	0	8	12	12	24	28	28	28	28
1	2	0	0	4	Sl-0. 4	0	0	0	4	8	20	24	28	28	28	28
0	1	0	0	1	Js-0.1	0	8	92	92	92	96	96	96	96	96	96
0	1	0	0	2	Js-0. 2	0	4	96	96	100	100	100	100	100	100	100
0	1	0	0	3	Js-0. 3	0	0	96	96	96	96	96	96	96	96	100
0	1	0	0	4	Js-0. 4	0	0	100	100	100	100	100	100	100	100	100
0	3	0	0	1	Sm-0. 1	0	0	0	0	0	0	12	20	32	36	40
0	3	0	0	2	Sm-0. 2	0	0	0	0	0	4	16	24	40	40	44
0	3	0	0	3	Sm-0. 3	0	0	0	0	0	0	36	60	68	68	72
0	3	0	0	4	Sm-0. 4	0	0	0	0	0	4	20	40	64	64	64
0	2	0	0	1	Sl-0. 1	0	0	0	0	16	28	28	28	28	28	28
0	2	0	0	2	Sl-0. 2	0	0	0	0	0	4	4	8	8	8	8
0	2	0	0	3	Sl-0. 3	0	0	0	0	28	28	32	32	32	32	32
0	2	0	0	4	Sl-0. 4	0	0	0	0	0	4	8	12	12	12	12

## Sheet: Spp CODE
	J. subulatus=	1
	S litoralis=	2
	B maritimus=	3
